# Supplementary material for: Brief communication: The occurrence of rogue waves in the interiorof the oceans: A modelling and computational study
Source: Copernicus journal article supplement (doi:10.5194/nhess-2018-238), 2018-08-14
Supplement: Supplementary file [file nhess-2018-238-AC1-supplement.pdf]

NHESS\_2018\_238 ‘The occurrence of rogue waves in the interior of the oceans: A modelling and computational study’

by K. W. Chow, H. N. Chan, and R. H. J. Grimshaw

Date: August 16, 2018

Reply to Referee 1:

We thank Professor Pelinovsky for his insightful and supportive comments. We respond in detail as follows.

(1) ‘...it would be reasonable to give an example of rogue wave characteristics in numbers using formula (1), for instance, characteristic lengths of carrier and envelope waves in 100m-depth basin...’

Response: Thank you for pointing out the need to verify the actual numerical orders of magnitude. For a basin depth ( $h$ ) of say 500m, the critical wavelength ( $\lambda_c$ ), wavenumber ( $k_c$ ) and internal wave mode ( $n$ ), the formulation in the text gives

$$\lambda_c = \frac{2\pi}{k_c} = \frac{2h}{n(4^{1/3} - 1)^{1/2}}$$

and with  $h = 500\text{m}$ , we can construct the following table:

| $n$ (internal mode number) | Rogue waves and instability can occur for wavelengths longer than $\lambda_c$ given by (in meters) |
|----------------------------|----------------------------------------------------------------------------------------------------|
| 1                          | 1305                                                                                               |
| 2                          | 652                                                                                                |
| 3                          | 435                                                                                                |
| 4                          | 326                                                                                                |
| 5                          | 261                                                                                                |

Hence ranges of ‘shallow’ and ‘intermediate’ depths are covered. We will add this appropriate text. (Note: we change the suggested depth to 500m, to get a better approximation for the oceanic situation.)

(2) ‘...rogue waves now occur for the shallow water regime..., but this conclusion has been made earlier in the paper...2010, and previous papers...2011...’

Response: Thank you for reminding us of these works, which are certainly relevant and will be referenced in the revision stage. However, there is a subtle difference between the two approaches. In the previous works by one of the authors in 2010 and 2011, the starting point was a long wave model, the extended Korteweg-de Vries equation. There is thus an assumption of long waves in the basic carrier wave envelope. In contrast, the Taylor-Goldstein equation for linear modes is utilized in

the present approach, and hence the fast oscillations inside the carrier envelope need not be in the long wave regime.

*'...the author's criterion should include the positivity of cubic nonlinear term in (the) Gardner (equation) as a particular case. Is it correct?'*

Yes, if we take the small wavenumber regime for the Taylor-Goldstein equation, then we can recover the Korteweg-de Vries and Gardner equations. However, such an asymptotic calculation will take us way beyond the 4-page limit of a 'brief communication' paper. Nevertheless, we will mention this connection.

(3) *'...important result is that the modulation instability can occur not only in shallow water,...but also in the intermediate depth basin.'* (underline = our re-phrasing)

Response: Yes, that is exactly one of our messages in writing this paper and we will emphasize this point.

(4) *'...the following papers...should be cited.'*

Response: Thank you, we shall add citations of these papers.
